# Supplementary material for: Costs of Providing HIV Self-Test Kits to Pregnant Women Living with HIV for Secondary Distribution to Male Partners in Uganda
Source: MDPI journal article supplement (doi:10.3390/diagnostics10050318), 2020-05-19
Supplement: s1 [file s1]

# Costs of Providing HIV Self-Test Kits to Pregnant Women Living With HIV for Secondary Distribution to Male Partners in Uganda

Michelle A. Bulterys<sup>1</sup>, Andrew Mujugira<sup>1,2</sup>, Agnes Nakyanzi<sup>2</sup>, Miriam Nampala<sup>2</sup>, Geoffrey Taasi<sup>3</sup>, Connie Celum<sup>1</sup> and Monisha Sharma<sup>1,\*</sup>

<sup>1</sup> International Clinical Research Center, Department of Global Health, University of Washington, Seattle, WA, 98104, USA; mbult@uw.edu (M.A.B.); mujugira@uw.edu (A.M.); ccelum@uw.edu (C.C.)

<sup>2</sup> Infectious Diseases Institute, Makerere University, Kampala, P.O. Box 22418, Uganda; anakyanzi@idi.co.ug (A.N.); mnampala@idi.co.ug (M.N.)

<sup>3</sup> Division of HIV Testing, Uganda Ministry of Health, Kampala, P.O. Box 7272, Uganda; taasi.taasi@gmail.com

\* Correspondence: msharma1@uw.edu

## Supplementary Materials

### Methods:

**Table 1. Activities, inputs, and data sources.**

| Activities                                                         | Resources/inputs                                                                                           | Source                                                                               |
|--------------------------------------------------------------------|------------------------------------------------------------------------------------------------------------|--------------------------------------------------------------------------------------|
| <i>Start-up</i>                                                    |                                                                                                            |                                                                                      |
| Materials development: SOPs, policy guidelines, training materials | Personnel time, supplies, consultancies                                                                    | Expense reports; staff interviews                                                    |
| Stakeholder meetings                                               | Personnel time, venue, refreshments, per diem, travel, supplies                                            | Expense reports; staff interviews                                                    |
| Trainings of program staff                                         | Personnel time, venue, refreshments, per diem, travel, supplies                                            | Expense reports; staff interviews                                                    |
| M&E start-up (if any)                                              | Personnel time, supplies, consultancies, contracted services                                               | Expense reports; staff interviews                                                    |
| <i>Recurrent</i>                                                   |                                                                                                            |                                                                                      |
| Personnel time of health workers                                   | Facility-level data (Personnel time, per diem, travel, phone/internet, office space) MoH data for scenario | Clinic expense reports; staff interviews; time motion; MoH pay scales and interviews |
| Personnel time of management/supervision                           | Personnel time, per diem, travel, phone/internet, office space                                             | Expense reports; staff interviews; time motion                                       |

|                                                              |                                                         |                                                    |
|--------------------------------------------------------------|---------------------------------------------------------|----------------------------------------------------|
| Capital costs (transport, IT equipment for data abstraction) | Personnel time, vehicles, supplies, fuel, IT equipment) | Expense reports; staff interviews                  |
| Intervention (HIVST kits)                                    | Cost quantity of HIVST kits purchased in bulk           | Study budget                                       |
| HIV rapid testing                                            | Personnel time, cost of rapid tests                     | Expense reports; staff interviews; Time and motion |

### Scenario 1: As-Studied

In the As-Studied scenario, we assumed five nurses work 264 days of the year. We estimated the number of women that could be reached if the nurses worked at full capacity, giving their full time to delivering this intervention. Based on TM observations and staff interviews, we estimated that it takes an average of 50 minutes to train and counsel a PWLHIV on how to deliver an HIVST kit to her male partner. Assuming each nurse worked 6 hours a day (accounting for distractions and delays), a nurse could reach an average of 7 women per day. Five nurses working 264 days a year, reaching 7 women per day, would equate to 9,240 women reached in one year. The same process was used to estimate the number of men who could be linked to clinic testing. The only difference comes from the amount of time it takes to see one male; we estimate it takes 40 minutes to see an HIV-negative male and 45 minutes to see an HIV-positive male. Annually, we estimate 11,880 HIV-negative men can be seen and 10,560 HIV-positive men can be seen if the clinic is working at full capacity. Costs were annualized over 5 years assuming a 3% discount rate. The column titled “% of intervention” in some costing tables indicates the proportion of that cost that was spent on delivering this intervention, as opposed to other interventions or routine care.

### Scenario 1: Summary Tables of Cost Metrics

#### Cost of distributing HIVST kits to HIV+ pregnant women

| Cost category                   | Total USD           | Category cost/woman |
|---------------------------------|---------------------|---------------------|
| Personnel                       | \$87,598.17         | \$9.48              |
| Vehicles + fuel + maintenance   | \$278.53            | \$0.03              |
| Office supplies                 | \$4,072.38          | \$0.44              |
| Utilities, building, overhead   | \$7,197.95          | \$0.78              |
| Other equipment                 | \$32.87             | \$0.00              |
| Startup training costs          | \$1,663.22          | \$0.18              |
| HIVST kits (\$2 each)           | \$18,480.00         | \$2.00              |
| <b>Total cost for one woman</b> | <b>\$119,323.11</b> | <b>\$12.91</b>      |

#### Cost of linking a HIV+ male partner to the clinic for HIV testing

| Cost category                 | USD         | Cost/man |
|-------------------------------|-------------|----------|
| Personnel                     | \$87,598.17 | \$8.30   |
| Vehicles + fuel + maintenance | \$278.53    | \$0.03   |

|                                                  |                     |                |
|--------------------------------------------------|---------------------|----------------|
| Office supplies                                  | \$4,072.38          | \$0.39         |
| Utilities                                        | \$7,197.95          | \$0.68         |
| Other equipment                                  | \$32.87             | \$0.00         |
| Startup training costs                           | \$1,663.22          | \$0.16         |
| Male reimbursement                               | \$85,852.80         | \$8.13         |
| Clinical supplies for rapid HIV testing          | \$24,606.58         | \$2.33         |
| <b>Total cost of testing HIV+ male at clinic</b> | <b>\$211,302.49</b> | <b>\$20.02</b> |

#### Cost of linking a HIV- male partner to the clinic for HIV testing

| Cost category                                    | USD                 | Cost/man       |
|--------------------------------------------------|---------------------|----------------|
| Personnel                                        | \$87,598.17         | \$7.37         |
| Vehicles + fuel + maintenance                    | \$278.53            | \$0.02         |
| Office Supplies                                  | \$4,072.38          | \$0.34         |
| Utilities                                        | \$7,197.95          | \$0.61         |
| Other equipment                                  | \$32.87             | \$0.00         |
| Startup training costs                           | \$1,663.22          | \$0.14         |
| Male reimbursement                               | \$96,584.40         | \$8.13         |
| Clinical supplies for rapid HIV testing          | \$24,606.58         | \$2.07         |
| <b>Total cost of testing HIV- male at clinic</b> | <b>\$222,034.09</b> | <b>\$18.68</b> |

#### Scenario 1: Personnel costs (excluding research time)

| Position Title                              | Number    | Gross Annual Salary | Total Cost | % for Intervention | Total for Intervention |
|---------------------------------------------|-----------|---------------------|------------|--------------------|------------------------|
| Physician/Investigator                      | 1         | 32,640              | 32,640     | 20%                | 6,528                  |
| Pharmacy Technician                         | 1         | 10,667              | 14,376     | 40%                | 5,750                  |
| Data officer (assume lower in MOH scenario) | 1         | 5,051               | 6,807      | 20%                | 1,361                  |
| Team lead nurse                             | 1         | 8,760               | 11,806     | 100%               | 11,806                 |
| Administrator (finance manager)             | 1         | 10,537              | 14,201     | 20%                | 2,840                  |
| Data Manager                                | 1         | 9,851               | 13,276     | 20%                | 2,655                  |
| Lab Technician                              | 1         | 8,998               | 12,127     | 20%                | 2,425                  |
| Peer Counselor Mothers (Study stipend only) | 2         | 2,026               | 4,052      | 100%               | 4,052                  |
| Recruitment Officer                         | 1         | 650                 | 876        | 100%               | 876                    |
| Nurses                                      | 4         | 7,764               | 41,854     | 100%               | 41,854                 |
| Facilities Assistant                        | 1         | 11,055              | 14,899     | 50%                | 7,449                  |
| <b>Total Staff:</b>                         | <b>21</b> |                     |            |                    | <b>87,598</b>          |

### Scenario 1: Clinical Supplies (only needed for male testing)

We excluded all standard of care costs, meaning no additional clinical supplies were needed for women receiving kits, which were free of charge at the clinic. The cost of clinical supplies needed for testing men included gloves, rapid HIV test and syphilis test.

| <b>Supplies needed for 1 Male Enrollment Visit just HIV testing</b> | <b>Cost/unit (\$)</b> | <b>Number units</b> | <b>Total cost</b> |
|---------------------------------------------------------------------|-----------------------|---------------------|-------------------|
| HIV determine testing kits (100/unit)                               | 1.03                  | 1                   | 1.03              |
| Gloves (100/unit)                                                   | 0.51                  | 2                   | 1.03              |
| Syphilis rapid testing kits (50/unit)                               | 0.27                  | 1                   | 0.27              |
| <b>Total cost of clinical supplies:</b>                             |                       |                     | <b>2.33</b>       |

### Scenario 1: Vehicles, fuel and maintenance

| <b>Item</b>                    | <b>Unit Cost</b> | <b>Number</b> | <b>Total Cost</b> | <b>Useful Life (yrs)</b> | <b>Annual Cost</b> | <b>% for Intervention</b> | <b>Total for Intervention</b> |
|--------------------------------|------------------|---------------|-------------------|--------------------------|--------------------|---------------------------|-------------------------------|
| 4WD Vehicle                    | 9,483            | 1             | 9,483             | 5                        | 2,091              | 5%                        | 105                           |
| Motorcycle                     | 271              | 1             | 271               | 5                        | 60                 | 5%                        | 3                             |
| <b>Total cost for vehicles</b> |                  |               |                   |                          |                    |                           | <b>108</b>                    |

| <b>Item</b>                                | <b>Number</b> | <b>Unit Cost</b> | <b>Total Cost</b> | <b>% for Intervention</b> | <b>Total for Intervention</b> |
|--------------------------------------------|---------------|------------------|-------------------|---------------------------|-------------------------------|
| Motorcycle fuel                            | 12            | 5.8              | 70                | 5%                        | 3                             |
| Motor vehicle fuel                         | 12            | 60               | 716               | 5%                        | 36                            |
| Insurance of motorcycle                    | 1             | 5                | 5                 | 5%                        | 0                             |
| Maintenance for motorcycle                 | 12            | 27               | 325               | 5%                        | 16                            |
| Maintenance for motor vehicle              | 4             | 542              | 2,168             | 5%                        | 108                           |
| Insurance of motor vehicle                 | 1             | 135              | 135               | 5%                        | 7                             |
| <b>Total cost for fuel and maintenance</b> |               |                  |                   |                           | <b>171</b>                    |

Scenario 1: Office supplies

| Item                          | Number | Unit Cost                             | Total Cost | % for Intervention | Total for Intervention |
|-------------------------------|--------|---------------------------------------|------------|--------------------|------------------------|
| Participant appointment cards | 500    | 300                                   | 41         | 100%               | 41                     |
| Storage cabinets              | 7      | 700,000                               | 1,328      | 100%               | 1,328                  |
| Extension cable               | 4      | 55,000                                | 60         | 100%               | 60                     |
| Participant binder files      | 500    | 13,000                                | 1,761      | 50%                | 881                    |
| Photocopying paper            | 300    | 25,000                                | 2,032      | 50%                | 1,016                  |
| Plastic files                 | 500    | 3,000                                 | 406        | 50%                | 203                    |
| Toner cartridge               | 4      | 700,000                               | 759        | 50%                | 379                    |
| Counter books                 | 12     | 10,000                                | 33         | 50%                | 16                     |
| Suspension files              | 500    | 2,200                                 | 298        | 50%                | 149                    |
|                               |        | <b>Total cost for office supplies</b> |            |                    | <b>4,072</b>           |

Scenario 1: Utilities, building and overhead

| Item                                    | Number                                       | Unit Cost | Total Cost | % for Intervention | Total for Intervention |
|-----------------------------------------|----------------------------------------------|-----------|------------|--------------------|------------------------|
| Airtime; Credit (per month)             | 12                                           | 19        | 228        | 100%               | 228                    |
| Electricity (per month)                 | 12                                           | 135.5     | 1,626      | 100%               | 1,626                  |
| Building/infrastructure maintenance     | 1                                            | 5,000     | 5,000      | 100%               | 5,000                  |
| Internet (for 3 Mifi devices per month) | 12                                           | 89        | 1,073      | 20%                | 215                    |
| Garbage disposal                        | 4                                            | 32.5      | 130        | 100%               | 130                    |
|                                         | <b>Total cost for utilities and building</b> |           |            |                    | <b>7,198</b>           |

Scenario 1: Start up and refresher trainings

| Item               | Number                                     | Unit Cost | Total Cost | % for Intervention | Total for Intervention |
|--------------------|--------------------------------------------|-----------|------------|--------------------|------------------------|
| Provider training  | 1                                          | 163       | 163        | 50%                | 81                     |
| Refresher training | 2                                          | 434       | 217        | 50%                | 108                    |
| Training materials | 1                                          | 53        | 53         | 50%                | 27                     |
|                    | <b>Total administrative training costs</b> |           |            |                    | <b>216</b>             |

| Item            | # days | # hours | Number | Annual Salary | Hourly salary | Time costs |
|-----------------|--------|---------|--------|---------------|---------------|------------|
| Team lead nurse | 3 days | 21      | 1      | 11,806        | 7.45          | 156.52     |

|                                                |        |    |   |        |       |                |
|------------------------------------------------|--------|----|---|--------|-------|----------------|
| Nurses                                         | 3 days | 21 | 4 | 41,854 | 26.42 | 554.88         |
| Coordinator to conduct training                | 3 days | 21 | 1 | 32,640 | 20.61 | 432.73         |
| Data manager                                   | 3 days | 21 | 1 | 9,851  | 6.22  | 130.60         |
| Peer support mothers                           | 3 days | 21 | 2 | 4,000  | 2.53  | 53.03          |
| Lab technician                                 | 3 days | 21 | 1 | 8,998  | 5.68  | 119.29         |
| <b>Total costs for personnel training time</b> |        |    |   |        |       | <b>1447.05</b> |

**Total training costs = \$216 + \$1447 = \$1,663**

## Scenario 2: MOH Implementation

In the Study in MOH scenario, we assumed the same numbers of women and men reached by five nurses working at full capacity for 264 days of the year.

Scenario 2: Summary tables of cost metrics

| <b>Cost of distributing HIVST kits to HIV+ pregnant women</b> |                    |                   |
|---------------------------------------------------------------|--------------------|-------------------|
| <b>Cost category</b>                                          | <b>Total USD</b>   | <b>Cost/woman</b> |
| Personnel                                                     | \$46,731.41        | \$5.06            |
| Vehicles + fuel + maintenance                                 | \$278.53           | \$0.03            |
| Office supplies                                               | \$4,072.38         | \$0.44            |
| Utilities, building, overhead                                 | \$7,197.95         | \$0.78            |
| Other equipment                                               | \$32.87            | \$0.00            |
| Startup training costs                                        | \$791.19           | \$0.09            |
| HIVST kits (\$2 each)                                         | \$18,480.00        | \$2.00            |
| <b>TOTAL COST</b>                                             | <b>\$77,584.33</b> | <b>\$8.40</b>     |

| <b>Cost of linking a HIV+ male partner to the clinic for HIV testing</b> |                     |                 |
|--------------------------------------------------------------------------|---------------------|-----------------|
| <b>Cost category</b>                                                     | <b>USD</b>          | <b>Cost/man</b> |
| Personnel                                                                | \$46,731.41         | \$4.43          |
| Vehicles + fuel + maintenance                                            | \$278.53            | \$0.03          |
| Office supplies                                                          | \$4,072.38          | \$0.39          |
| Utilities                                                                | \$7,197.95          | \$0.68          |
| Other equipment                                                          | \$32.87             | \$0.00          |
| Startup training costs                                                   | \$791.19            | \$0.07          |
| Male reimbursement                                                       | \$85,852.80         | \$8.13          |
| Clinical supplies for rapid HIV testing                                  | \$23,971.20         | \$2.27          |
| <b>Total cost of testing HIV+ male at clinic</b>                         | <b>\$168,928.33</b> | <b>\$16.00</b>  |

| <b>Cost of linking a HIV- male partner to the clinic for HIV testing</b> |                     |                 |
|--------------------------------------------------------------------------|---------------------|-----------------|
| <b>Cost category</b>                                                     | <b>USD</b>          | <b>Cost/man</b> |
| <b>Personnel</b>                                                         | \$46,731.41         | \$3.93          |
| <b>Vehicles + fuel + maintenance</b>                                     | \$278.53            | \$0.02          |
| <b>Office supplies</b>                                                   | \$4,072.38          | \$0.34          |
| <b>Utilities</b>                                                         | \$7,197.95          | \$0.61          |
| <b>Other equipment</b>                                                   | \$32.87             | \$0.00          |
| <b>Startup training costs</b>                                            | \$791.19            | \$0.07          |
| <b>Male reimbursement</b>                                                | \$96,584.40         | \$8.13          |
| <b>Clinical supplies for rapid HIV testing</b>                           | \$23,971.20         | \$2.02          |
| <b>Total cost of testing HIV- male at clinic</b>                         | <b>\$179,659.93</b> | <b>\$15.12</b>  |

## Scenario 2: Personnel costs

Personnel staffing structure remained the same as Scenario 1, however the annual salaries were modified to match the Uganda Ministry of Health pay scales.<sup>1</sup>

| Position Title                             | Number    | Gross Annual Salary | Total Cost (+34.7% benefits) | % for Intervention | Total for Intervention |
|--------------------------------------------|-----------|---------------------|------------------------------|--------------------|------------------------|
| Physician/Investigator                     | 1         | 12,193              | 16,432                       | 20%                | 3,286                  |
| Pharmacy Technician                        | 1         | 10,667              | 14,376                       | 40%                | 5,750                  |
| Data manager                               | 1         | 9,754               | 13,146                       | 20%                | 2,629                  |
| Team lead nurse                            | 1         | 3,902               | 5,258                        | 100%               | 5,258                  |
| Administrator (finance manager)            | 1         | 10,537              | 14,201                       | 20%                | 2,840                  |
| Data Manager                               | 1         | 9,851               | 13,276                       | 20%                | 2,655                  |
| Lab Technician                             | 1         | 1,020               | 1,375                        | 20%                | 275                    |
| Peer Counselor Mothers (gov't salary only) | 2         | 406                 | 813                          | 100%               | 813                    |
| Recruitment Officer                        | 1         | 650                 | 876                          | 100%               | 876                    |
| Nurses (assume U6 level)                   | 4         | 2,764               | 14,898                       | 100%               | 14,898                 |
| Facilities Assistant                       | 1         | 11,055              | 14,899                       | 50%                | 7,449                  |
| <b>Total Staff</b>                         | <b>21</b> |                     | <b>Total personnel costs</b> |                    | <b>46,731</b>          |

## Scenario 2: Clinical supplies

We excluded all standard of care costs, meaning no additional clinical supplies were needed for the female study participants. The cost of clinical supplies needed for testing men included gloves and a DUAL HIV/syphilis test.

| Supplies needed for 1 Male Enrollment Visit just HIV testing                       | Cost/unit (\$) | Number units | Total cost  |
|------------------------------------------------------------------------------------|----------------|--------------|-------------|
| Gloves (100/unit)<br>- A box of 100 gloves costs UGX 50,000 (approx \$0.135/glove) | 0.135          | 2            | 0.27        |
| Syphilis rapid testing kits (50/unit)                                              | 2.000          | 1            | 2.00        |
| <b>Total cost of clinical supplies:</b>                                            |                |              | <b>2.27</b> |

Scenario 2: Vehicles, fuel and maintenance, office supplies, utilities and building, were assumed to be the same costs as Scenario 1.

## Scenario 2: Start up and refresher trainings

| Item               | Number | Unit Cost                                  | Total Cost | % for Intervention | Total for Intervention |
|--------------------|--------|--------------------------------------------|------------|--------------------|------------------------|
| Provider training  | 1      | 163                                        | 163        | 50%                | 81                     |
| Refresher training | 2      | 434                                        | 217        | 50%                | 108                    |
| Training materials | 1      | 53                                         | 53         | 50%                | 27                     |
|                    |        | <b>Total administrative training costs</b> |            |                    | <b>216</b>             |

| Item                                   | # days | # hours                                        | Number | Annual Salary | Hourly salary | Time costs    |
|----------------------------------------|--------|------------------------------------------------|--------|---------------|---------------|---------------|
| Team lead nurse                        | 3 days | 21                                             | 1      | 5,258         | 3.32          | 69.71         |
| Nurses                                 | 3 days | 21                                             | 4      | 3,725         | 2.35          | 49.38         |
| Coordinator (responsible for training) | 3 days | 21                                             | 1      | 16,432        | 10.37         | 217.85        |
| Data manager                           | 3 days | 21                                             | 1      | 13,146        | 8.30          | 174.28        |
| Peer support mothers                   | 3 days | 21                                             | 2      | 813           | 0.51          | 10.78         |
| <b>Lab technician</b>                  | 3 days | 21                                             | 1      | 4,000         | 2.53          | 53.03         |
|                                        |        | <b>Total costs for personnel training time</b> |        |               |               | <b>575.03</b> |

**Total training costs = \$216 + \$575 = \$791**

### Scenario 3: MOH Roll-Out

In the MOH Roll-Out scenario, we assumed two nurses would be working at full capacity for 264 days of the year. Costs were calculated from the MOH payer perspective, and therefore costs for HIVST kits were assumed to be purchased in bulk with subsidized discounts. In this scenario, HIVST is delivered by group counseling through antenatal waiting room discussions to pregnant women regardless of HIV status, instead of individual counseling for PWLHIV only (as in Scenarios 1 & 2). Total HIVST group counseling and distribution takes an average of 70 mins, with an average of 30 pregnant women attending. If nurses are working at full capacity, we assume that 150 women can receive the HIVST training in 1 day from a total of 5 trainings; however, approximately 80% of those women choose to take a kit home to deliver to their male partner. Therefore, we will assume 24 (80% of 30) women are reached in each group counseling session, equating to 120 women in a day and 63,360 in a year. In this scenario, only men who self-test positive are encouraged to link to clinic testing. Assuming that it takes an average of 24 minutes to test and counsel an HIV+ male, 15 men can be seen per day by each nurse, equating to 7920 men seen in a year.

#### Scenario 3: Summary tables for cost metrics

##### Cost of distributing an HIVST kits to HIV+ Pregnant women

| Cost category                 | Total USD           | Cost/woman    |
|-------------------------------|---------------------|---------------|
| Personnel                     | \$21,731.88         | \$0.34        |
| Vehicles + fuel + maintenance | \$278.53            | \$0.00        |
| Office supplies               | \$4,072.38          | \$0.06        |
| Utilities, building, overhead | \$7,197.95          | \$0.11        |
| Other equipment               | \$32.87             | \$0.00        |
| Startup training costs        | \$411.44            | \$0.01        |
| Toll free call center         | \$8,019.69          | \$0.13        |
| HIVST kits (\$2 each)         | \$126,720.00        | \$2.00        |
| <b>TOTAL COST</b>             | <b>\$168,464.73</b> | <b>\$2.65</b> |

##### Cost of linking a HIV+ male partner to the clinic for HIV testing

| Cost category                                    | USD                | Cost/man      |
|--------------------------------------------------|--------------------|---------------|
| Personnel                                        | \$21,731.88        | \$2.74        |
| Vehicles + fuel + maintenance                    | \$278.53           | \$0.04        |
| Office supplies                                  | \$4,072.38         | \$0.51        |
| Utilities                                        | \$7,197.95         | \$0.91        |
| Other equipment                                  | \$32.87            | \$0.00        |
| Startup training costs                           | \$411.44           | \$0.05        |
| Clinical supplies for rapid HIV testing          | \$17,978.40        | \$2.27        |
| Toll free call center                            | \$1,002.46         | \$0.13        |
| <b>Total cost of testing HIV+ male at clinic</b> | <b>\$52,705.90</b> | <b>\$6.65</b> |

### Scenario 3: Personnel costs

| Position Title                                    | Number    | Gross Annual Salary          | Total Cost | % for Intervention | Total for Intervention |
|---------------------------------------------------|-----------|------------------------------|------------|--------------------|------------------------|
| Senior Program Director (MOH person to supervise) | 1         | 21,600                       | 21,600     | 40%                | 8,640                  |
| Data manager                                      | 1         | 9,754                        | 13,146     | 20%                | 2,629                  |
| Team lead nurse                                   | 1         | 3,902                        | 5,258      | 5%                 | 263                    |
| Peer Counselors/ Peer Mothers (gov't salary only) | 4         | 406                          | 1,626      | 100%               | 1,626                  |
| Recruitment Officer                               | 1         | 650                          | 876        | 100%               | 876                    |
| Nurses (assume U6 level)                          | 1         | 3,691                        | 4,974      | 5%                 | 249                    |
| Facilities Assistant                              | 1         | 11,055                       | 14,899     | 50%                | 7,449                  |
| <b>Total Staff</b>                                | <b>10</b> | <b>Total personnel costs</b> |            |                    | <b>21,732</b>          |

### Scenario 3: Clinical supplies

We excluded all standard of care costs, meaning no additional clinical supplies were needed for the female study participants. The cost of clinical supplies needed for testing men included gloves and a DUAL HIV/syphilis test.

| Supplies needed for 1 Male Enrollment Visit just HIV testing                         | Cost/unit (\$) | Number units | Total cost  |
|--------------------------------------------------------------------------------------|----------------|--------------|-------------|
| Gloves (100/unit)<br>- A box of 100 gloves in UG costs 50,000 (approx \$0.135/glove) | 0.135          | 2            | 0.27        |
| Syphilis rapid testing kits (50/unit)                                                | 2.000          | 1            | 2.00        |
| <b>Total cost of clinical supplies:</b>                                              |                |              | <b>2.27</b> |

Scenario 3: Vehicles, fuel and maintenance, office supplies, utilities and building, were assumed to be the same costs as Scenario 1 and 2.

### Scenario 3: MOH start up and refresher trainings

| Item               | Number | Unit Cost                                  | Total Cost | % for Intervention | Total for Intervention |
|--------------------|--------|--------------------------------------------|------------|--------------------|------------------------|
| Provider training  | 1      | 163                                        | 163        | 50%                | 81                     |
| Refresher training | 2      | 434                                        | 217        | 50%                | 108                    |
| Training materials | 1      | 53                                         | 53         | 50%                | 27                     |
|                    |        | <b>Total administrative training costs</b> |            |                    | <b>216</b>             |

| Item                                           | # days | # hours | Number | Total annual salaries | Total hourly salaries | Time costs    |
|------------------------------------------------|--------|---------|--------|-----------------------|-----------------------|---------------|
| Team lead nurse                                | 1 days | 7       | 1      | 5,258                 | 3.32                  | 23.24         |
| Nurse                                          | 1 days | 7       | 1      | 3,725                 | 2.35                  | 16.46         |
| Coordinator<br>(responsible for training)      | 1 days | 7       | 1      | 16,432                | 10.37                 | 72.62         |
| Data manager                                   | 1 days | 7       | 1      | 13,146                | 8.30                  | 58.09         |
| Peer support counsellors/mothers               | 1 days | 7       | 4      | 1,626                 | 1.03                  | 7.19          |
| Lab technician                                 | 1 days | 7       | 1      | 4,000                 | 2.53                  | 17.68         |
| <b>Total costs for personnel training time</b> |        |         |        |                       |                       | <b>195.28</b> |

**Total training costs = \$216 + \$195 = \$411**

### Scenario 3: Toll-Free Call Center

The Uganda Ministry of Health offers a nationwide toll-free call number (funded by PEPFAR) for any Ugandan interested in learning more about or being counseling through HIVST. The call center phone number is printed on all HIVST kits provided in Uganda. Phone counselors are trained and callers can request to speak to a male or female counselor. All call center costs were provided directly by the Uganda Ministry of Health and we assumed that these were annualized at 5 years with 3% discount. Assuming that there are 1,665,000 live births annually in Uganda, and 50% of pregnant women take home HIVST kits (832,500). In Scenario 3, we assumed 63,360 women would be reached through our hypothetical clinic implementation (see description about Scenario 3 above), which is 8% of the 832,500 women assumed to take home an HIVST. We calculated 8% of the total annual call center costs (\$105,372) which was \$8,019.69. This total cost divided by the total number of women reached in our hypothetical scenario (63,360), we assume the call center costs \$0.13 for every kit taken home.

| Item                                   | Number | Unit Cost | Total in USD | Total for Intervention |
|----------------------------------------|--------|-----------|--------------|------------------------|
| Airtime for inbound and outbound calls | 12     | 1354.75   | 16,257       | 16,257                 |
| Customer relations manager             | 1      | 27,095.00 | 27,095       | 27,095                 |
| Call center system maintenance         | 12     | 270.92    | 3,251        | 3,251                  |
| Human resources                        | 24     | 758.67    | 18,208       | 18,208                 |
| Website                                | 1      | 813.00    | 813          | 813                    |
| smart phones                           | 2      | 217.00    | 434          | 95                     |
| Laptop                                 | 1      | 1,219.00  | 1,219        | 266                    |
| Headsets                               | 4      | 325.25    | 1,301        | 284                    |
| Media                                  | 6      | 541.80    | 3,251        | 3,251                  |
| advertisements                         | 20     | 54.20     | 1,084        | 1,084                  |

|                                        |        |           |        |                |
|----------------------------------------|--------|-----------|--------|----------------|
| print advert                           | 40,000 | 0.04      | 1,626  | 1,626          |
| SMS platform<br>(reminders)            | 5000   | 0.65      | 3,251  | 3,251          |
| Promotional materials                  | 1      | 18,154.00 | 18,154 | 18,154         |
| Call center marketing<br>in facilities | 24     | 489.08    | 11,738 | 11,738         |
| <b>TOTAL COST</b>                      |        |           |        | <b>105,372</b> |

## References

1. Uganda Ministry of Public Service. *Salary Structure FY 2018/2019 (Schedule 1-12)*. <https://publicservice.go.ug/download/salary-structure-fy-2018-2019-schedule-1-12/>. Accessed on March 1, 2020.
